# Supplementary material for: High-resolution crystal structure of Z-DNA in complex with Cr3+ cations
Source: PubMed Central journal article supplement (PMC4381091; doi:10.1007/s00775-015-1247-5), 2015-02-17
Supplement: 775_2015_1247_MOESM1_ESM.pdf [file 775_2015_1247_MOESM1_ESM.pdf]

## Supplementary Material

### High-resolution crystal structure of Z-DNA in complex with Cr<sup>3+</sup> cations

Pawel Drozdal<sup>a</sup>, Mirosław Gilski<sup>a,b</sup>, Ryszard Kierzek<sup>b</sup>,  
Lechosław Lomozik<sup>a</sup>, Mariusz Jaskolski<sup>\*a,b</sup>

<sup>a</sup> Faculty of Chemistry, A. Mickiewicz University, Poznan, Poland

<sup>b</sup> Institute of Bioorganic Chemistry, Polish Academy of Sciences, Poznan, Poland

**Supplementary Table S1.** Data collection and refinement statistics for the d(CGCGCG)<sub>2</sub>-Cr<sup>3+</sup> structure (unmerged Bijvoet pairs).

| Resolution<br>(Å) | Number of reflections |              | Completeness<br>(%) | $R_{\text{merge}}$<br>(%) | $\langle I/\sigma I \rangle$ | $R\text{-meas}^{(a)}$<br>(%) | Anomalous<br>CC <sup>(b)</sup><br>(%) |
|-------------------|-----------------------|--------------|---------------------|---------------------------|------------------------------|------------------------------|---------------------------------------|
|                   | observed              | unique       |                     |                           |                              |                              |                                       |
| 4.35              | 1158                  | 291          | 98.3                | 1.3                       | 97.98                        | 1.5                          | 73                                    |
| 3.08              | 2382                  | 547          | 98.9                | 1.3                       | 95.82                        | 1.4                          | 58                                    |
| 2.51              | 3947                  | 707          | 100.0               | 1.4                       | 96.92                        | 1.6                          | 64                                    |
| 2.18              | 3939                  | 855          | 99.9                | 1.6                       | 81.97                        | 1.8                          | 69                                    |
| 1.95              | 3259                  | 941          | 99.2                | 1.7                       | 64.04                        | 2.0                          | 53                                    |
| 1.78              | 2956                  | 1044         | 98.2                | 1.7                       | 53.82                        | 2.1                          | 45                                    |
| 1.64              | 2767                  | 1131         | 98.3                | 1.8                       | 45.94                        | 2.3                          | 37                                    |
| 1.54              | 2818                  | 1222         | 98.6                | 1.8                       | 38.90                        | 2.4                          | 40                                    |
| 1.45              | 2976                  | 1300         | 98.3                | 2.4                       | 30.80                        | 3.1                          | 29                                    |
| 1.38              | 3153                  | 1376         | 98.7                | 3.4                       | 24.11                        | 4.4                          | 24                                    |
| 1.31              | 3271                  | 1435         | 99.3                | 4.3                       | 19.97                        | 5.6                          | 13                                    |
| 1.26              | 3439                  | 1531         | 99.0                | 4.6                       | 17.68                        | 5.9                          | 11                                    |
| 1.21              | 3563                  | 1578         | 99.8                | 6.6                       | 12.87                        | 8.6                          | 10                                    |
| 1.16              | 3701                  | 1667         | 99.6                | 7.1                       | 12.05                        | 9.3                          | 7                                     |
| 1.12              | 3811                  | 1718         | 99.6                | 8.9                       | 9.54                         | 11.5                         | 16                                    |
| 1.09              | 3902                  | 1776         | 99.2                | 11.9                      | 7.26                         | 15.4                         | 9                                     |
| 1.06              | 3935                  | 1804         | 98.6                | 16.9                      | 5.17                         | 21.9                         | 3                                     |
| 1.03              | 4055                  | 1876         | 98.0                | 22.1                      | 3.91                         | 28.8                         | -2                                    |
| 1.00              | 4013                  | 1869         | 97.5                | 33.4                      | 2.64                         | 43.4                         | 2                                     |
| 0.97              | 3987                  | 1867         | 93.2                | 43.2                      | 2.05                         | 56.5                         | 8                                     |
| <b>total</b>      | <b>67032</b>          | <b>26535</b> | <b>98.4</b>         | <b>1.6</b>                | <b>24.85</b>                 | <b>1.9</b>                   | <b>17</b>                             |

(a) Redundancy independent R-factor (intensities) [1].

(b) Correlation coefficient between two random subsets of anomalous intensity differences [1].

**Supplementary Table S2.** Sugar and phosphate backbone torsion angles for the  $d(\text{CGCGCG})_2\text{-Cr}^{3+}$  structure, with standard uncertainties in parentheses.

| d(CGCGCG) <sub>2</sub> in the Cr <sup>3+</sup> complex |                   |                      |                   |           |                   |                   |                      |                     |          |                   |                     |           |
|--------------------------------------------------------|-------------------|----------------------|-------------------|-----------|-------------------|-------------------|----------------------|---------------------|----------|-------------------|---------------------|-----------|
| Angle                                                  | C1(I)<br>C1(II)   | C3(I)<br>C3(II)      | C5(I)<br>C5(II)   | C7        | C9(I)<br>C9(II)   | C11(I)<br>C11(II) | G2(I)<br>G2(II)      | G4(I)<br>G4(II)     | G6       | G8(I)<br>G8(II)   | G10(I)<br>G10(II)   | G12       |
| α                                                      | -                 | 158(8)<br>-160(10)   | 171(6)<br>-158(5) | -         | -150(3)<br>163(9) | 171(9)<br>-177(8) | 62(18)<br>74(18)     | 71(15)<br>81(35)    | 84(3)    | 61(2)             | 67.7(9)             | 84(1)     |
| β                                                      | -                 | 151(16)<br>-120(22)  | 149(3)<br>-126(3) | -         | -132(2)<br>153(6) | 145(1)<br>-136(6) | -174(12)<br>-175(12) | 179(10)<br>174(26)  | -179(1)  | -176(1)           | -168.7(7)           | -177.6(9) |
| γ                                                      | 49(5)             | 62(31)<br>51(38)     | 52(3)<br>63(3)    | 45(2)     | 61(3)<br>56(6)    | 51(2)<br>72(4)    | -166(10)<br>163(11)  | 176(11)<br>176(35)  | -170(2)  | 178(1)            | -177.4(9)           | -173(1)   |
| δ                                                      | 147(7)<br>143(8)  | 138(21)<br>136(26)   | 145(1)            | 143(2)    | 151(1)            | 137.4(9)          | 93(5)<br>95(6)       | 95(14)<br>92(30)    | 152(2)   | 93(3)<br>89(5)    | 88(2)<br>96(8)      | 151(1)    |
| ε                                                      | -88(8)<br>-102(6) | -94(21)<br>-93(27)   | -97(1)            | -94(2)    | -98(1)            | -99.2(9)          | -167(4)<br>-136(3)   | -174(6)<br>-104(11) | -        | -105(4)<br>173(8) | -174(3)<br>-112(14) | -         |
| ζ                                                      | 70(11)<br>87(11)  | 76(14)<br>64(21)     | 65(2)             | 79(2)     | 78(1)             | 61.6(9)           | 59(6)<br>-55(4)      | 62(9)<br>-74(14)    | -        | -78(4)<br>73(11)  | 75(3)<br>-55(18)    | -         |
| χ                                                      | -154(1)           | -156.4(7)            | -156.8(8)         | -153.5(8) | -160.7(7)         | -153.2(9)         | 50(15)<br>66(5)      | 60(2)               | 70(1)    | 55(2)             | 56(1)               | 70(1)     |
| v0                                                     | -25(3)            | -25(14)<br>-36(18)   | -27(1)            | -30(2)    | -24(1)            | -34(1)            | -7(9)<br>2(5)        | -4(2)               | -23(1)   | -5(2)             | -8(1)               | -22(1)    |
| v1                                                     | 37(3)             | 35(12)<br>44(11)     | 39(2)             | 37(2)     | 39(1)             | 41(1)             | -9(8)<br>-13(4)      | -11(2)              | 37(2)    | -10(2)            | -10(1)              | 37(1)     |
| v2                                                     | -36(3)            | -31(20)<br>-35(20)   | -35(1)            | -31(2)    | -38(1)            | -32(1)            | 19(6)<br>18(5)       | 20(3)               | -35(2)   | 20(2)             | 22(1)               | -38(1)    |
| v3                                                     | 23(3)             | 18(25)<br>15(29)     | 20(1)             | 15(2)     | 24.2(9)           | 12(1)             | -24(4)<br>-17(6)     | -23(2)              | 22(2)    | -23(1)            | -28(1)              | 26(1)     |
| v4                                                     | 1(3)              | 4(24)<br>12(28)      | 4(1)              | 10(2)     | -0.1(9)           | 13(1)             | 20(6)<br>10(6)       | 17(2)               | 0(2)     | 18(1)             | 22(1)               | -3(1)     |
| Pseudorotation parameters:                             |                   |                      |                   |           |                   |                   |                      |                     |          |                   |                     |           |
| <i>P</i>                                               | 160.6(8)          | 155.0(6)<br>145(1)   | 156.0(9)          | 147(1)    | 161.9(4)          | 143.2(6)          | 35.3(9)<br>12.6(3)   | 26.8(6)             | 161.4(7) | 30.2(6)           | 34.6(7)             | 166.3(7)  |
| <i>τ<sub>m</sub></i>                                   | 39.2(5)           | 35.5(4)<br>43.9(7)   | 39.3(6)           | 37.7(7)   | 40.5(3)           | 40.8(4)           | 24.2(4)<br>18.9(1)   | 23.2(2)             | 38.2(5)  | 23.6(2)           | 27.6(3)             | 39.6(5)   |
| Sugar pucker                                           | C2'-endo          | C2'-endo<br>C2'-endo | C2'-endo          | C2'-endo  | C2'-endo          | C1'-exo           | C3'-endo<br>C3'-endo | C3'-endo            | C2'-endo | C3'-endo          | C3'-endo            | C2'-endo  |

Table 3 footnote:

All numerical values in the table are in degrees. The furanose pseudorotation amplitude ( $\tau_m$ ) and phase angle ( $P$ ) as well as their deviations (values in parentheses) from the ideal (cyclopentane) model were calculated by the method of Jaskolski [2]. The upper/bottom values refer to conformation I/II of the DNA chain in the  $d(\text{CGCGCG})_2\text{-Cr}^{3+}$  structure. Angle definition:  $\alpha$ : O3'(n1)-P-O5'-C5'  $\beta$ : P-O5'-C5'-C4',  $\gamma$ : O5'-C5'-C4'-C3',  $\delta$ : C5'-C4'-C3'-O3',  $\epsilon$ : C4'-C3'-O3'-P(n+1),  $\zeta$ : C3'-O3'-P(n+1)-O5'(n+1),  $\chi$ : O4'-C1'-N1-C2 (pyrimidines), O4'-C1'-N9-C4 (purines).

**Supplementary Table S3.** Average base-pair and local base-pair step helical parameters for selected Z-DNA structures in complex with d-block metal cations identified by their PDB codes in parentheses.

|                                                                           | Helical twist<br>$\Omega_h$ (°) | Helical rise<br>(Å) | Inclination<br>$\eta$ (°) | Tip<br>(°)       | Tilt<br>(°)    | Roll<br>(°)    | Shift<br>(Å)   | Slide<br>(Å) | Rise<br>(Å)  |
|---------------------------------------------------------------------------|---------------------------------|---------------------|---------------------------|------------------|----------------|----------------|----------------|--------------|--------------|
| $d(\text{CGCGCG})_2\text{-Cr}^{3+}$<br>(4r15) <sup>a</sup>                | -60.94<br>-60.43                | 3.52<br>3.63        | 4.33<br>4.03              | 0.19<br>1.06     | -0.40<br>-0.27 | -1.56<br>-1.70 | -0.02<br>-0.03 | 3.07<br>3.04 | 3.52<br>3.51 |
| $d(\text{CGCGCG})_2\text{-Spk-Mn}^{2+}$<br>(4hig)                         | -58.99                          | 4.50                | 17.45                     | 5.23             | 0.71           | -3.10          | -0.07          | 2.79         | 3.45         |
| $d(\text{CGCGCG})_2\text{-Spk-Zn}^{2+}$<br>(4hif)                         | -60.93                          | 4.11                | 15.64                     | 0.47             | -0.03          | -2.45          | -0.14          | 2.87         | 3.52         |
| $d(\text{CACGCG}):d(\text{CGCGTG})\text{-Mn}^{2+}$<br>(3fq5) <sup>b</sup> | -58.72<br>-60.10                | 3.99<br>3.94        | 11.45<br>7.94             | -12.58<br>-12.42 | -0.76<br>-0.81 | -1.46<br>-1.85 | -0.02<br>-0.03 | 2.77<br>2.91 | 3.62<br>3.69 |
| $d(\text{CACGCG}):d(\text{CGCGTG})\text{-Mn}^{2+}$<br>(4dwy) <sup>b</sup> | -57.75<br>-59.34                | 3.64<br>4.08        | 3.64<br>18.94             | -1.38<br>-8.19   | -0.81<br>0.08  | -1.52<br>-1.78 | -0.04<br>0.03  | 2.82<br>3.00 | 3.54<br>3.63 |
| $d(\text{CACGCG}):d(\text{CGCGTG})\text{-Mn}^{2+}$<br>(4dy8)              | -62.37                          | 2.90                | 2.38                      | -14.51           | -0.23          | -2.01          | -0.20          | 2.89         | 3.48         |
| $d(\text{CGCGCG})_2\text{-Cu}^{2+}$<br>(1d39)                             | -60.45                          | 4.08                | 8.48                      | -1.48            | 0.04           | -2.67          | 0.02           | 2.85         | 3.55         |

(a) Upper/bottom values refer to two alternate conformations present for the duplex in the asymmetric unit.

(b) Upper/bottom values refer to two duplexes present in the asymmetric unit.

## REFERENCES

- 1 Kabsch W (2010) *Acta Cryst D* 66:125–132
- 2 Jaskolski M (1984) *Acta Cryst D* 40:364–366
